# Supplementary material
Source: publisher figshare collection journal article supplement (https://tandf.figshare.com/ndownloader/files/22276233)
Supplement: Supplementary file 1 [file 22276233]

## **Supplemental Material**

### **Intraseasonal variation and future projection of atmospheric diffusion conditions conducive to extreme haze formation over eastern China**

Weiyang FENG<sup>a,b</sup>, Minghuai WANG<sup>a,b</sup>, Yang ZHANG<sup>c</sup>, Xianglin DAI<sup>c</sup>, Xiaohong LIU<sup>d</sup> and Yangyang XU<sup>d</sup>

<sup>a</sup>School of Atmospheric Sciences, Nanjing University, Nanjing, China; <sup>b</sup>Joint International Research Laboratory of Atmospheric and Earth System Sciences & Institute for Climate and Global Change Research, Nanjing University, Nanjing, China; <sup>c</sup>CMA-NJU Joint Laboratory for Climate Prediction Studies, Institute for Climate and Global Change Research, School of Atmospheric Sciences, Nanjing University, Nanjing, China; <sup>d</sup>Department of Atmospheric Sciences, Texas A&M University, College Station Texas, USA

#### **This file includes:**

Supplementary Table S1 and Figures S1–S3

**Table S1.** The frequency of haze events (times per 10 winters) between 2006–15 and 2090–99 in three scenarios: 7 simulations of RCP8.5; 14 simulations of RCP8.5\_fixedaerosol; and 14 simulations of RCP8.5\_fixedGHG.

|         | RCP8.5 | RCP8.5_fixedaerosol | RCP8.5_fixedGHG |
|---------|--------|---------------------|-----------------|
| 2006–15 | 54.3   | 53.9                | 55.1            |
| 2090–99 | 60.1   | 55.5                | 57.7            |

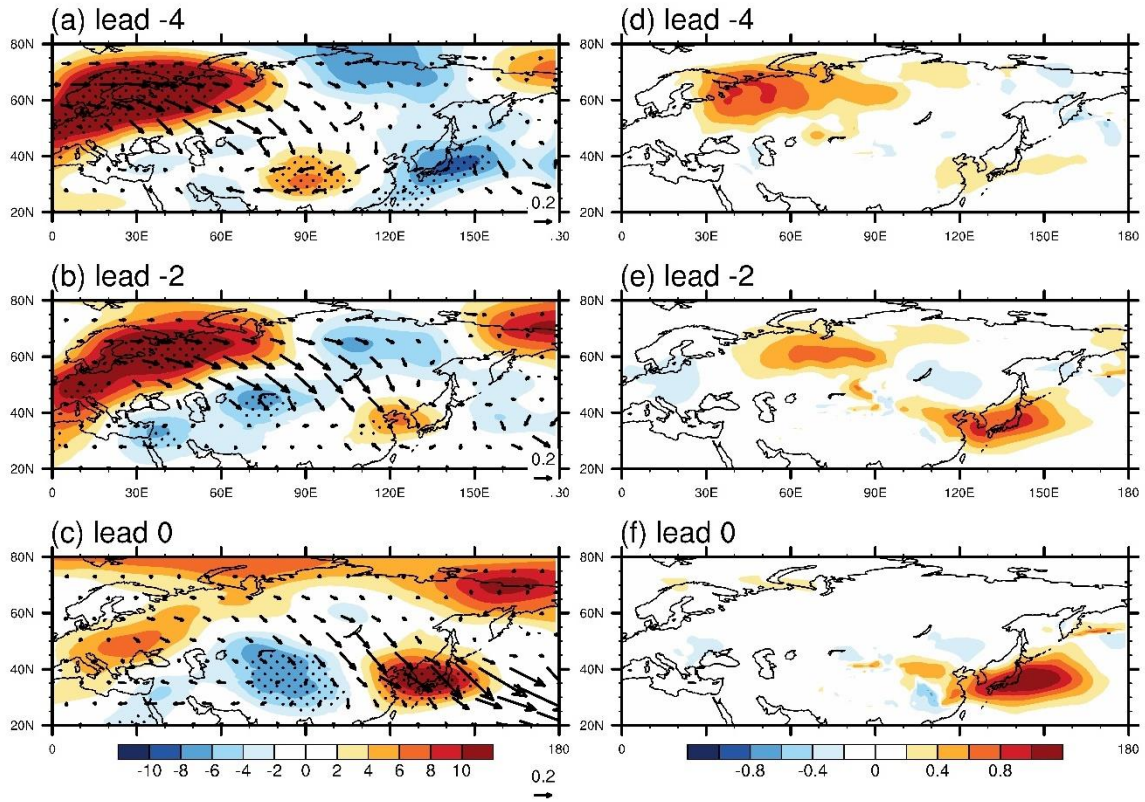

**Figure S1.** Changes of 200-hPa horizontal wave activity flux (WAF) overlaid on the 500-hPa geopotential height anomaly at a lead of (a) -4, (b) -2, and (c) 0 days of haze events between 2006–15 and 2090–99 under the RCP8.5 scenario. (d–f) As in (a–c) but for 850-hPa vertical WAF. Dotted areas denote where the change is statistically significant at the 0.05 level.

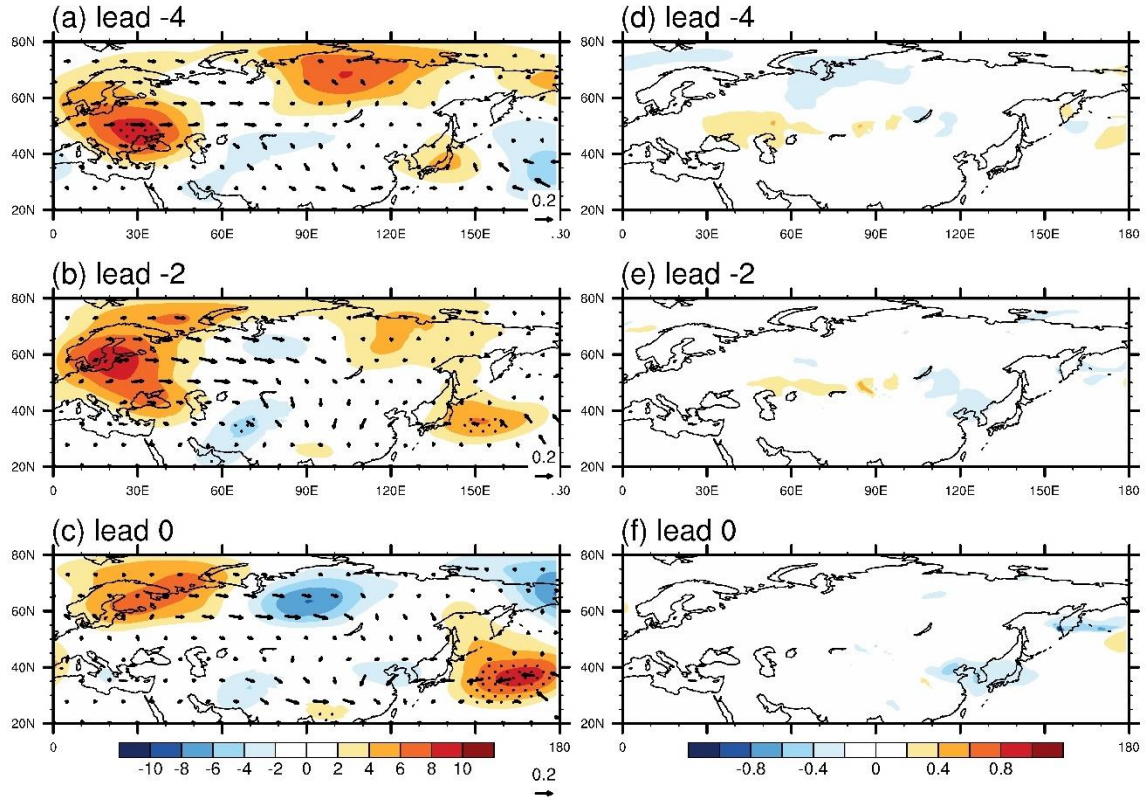

**Figure S2.** Changes of 200-hPa horizontal wave activity flux (WAF) overlaid on the 500-hPa geopotential height anomaly at a lead of (a) -4, (b) -2, and (c) 0 days of haze events between 2006–15 and 2090–99 under RCP8.5\_fixedaerosol. (d–f) As in (a–c) but for 850-hPa vertical WAF. Dotted areas denote where the change is statistically significant at the 0.05 level.

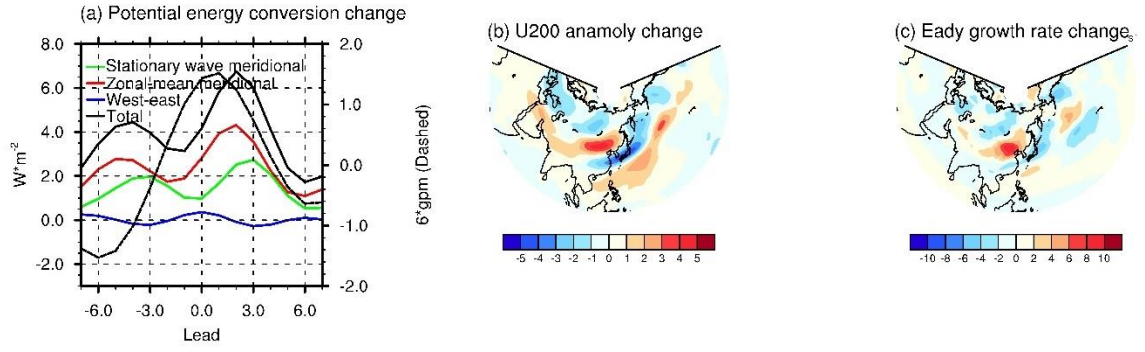

**Figure S3.** Change of composite haze events between 2006–15 and 2090–99 under RCP8.5:

(a) temporal variation of the 500-hPa potential energy conversion term in the East China Sea (30 °–45 °N, 120 °–150 °E); (b) composite anomalies of 200-hPa zonal wind (shading) at a lead of –1 day of haze events; (c) composite maximum Eady rate (shading) at a lead of –1 day of haze events.
